# Supplementary material for: Superior Ionic Transferring Polymer with Silicon Dioxide Composite Membrane via Phase Inversion Method Designed for High Performance Sodium-Ion Battery
Source: MDPI journal article supplement (doi:10.3390/polym12020405), 2020-02-11

**1. S1. Physical properties of membrane with different weight ratios of PVdF-SiO<sub>2</sub>**

| S.no | PVdF-SiO <sub>2</sub><br>(Weight %) | Physical appearance of membrane | Flexibility of membrane | Digital image of membrane                                                            |
|------|-------------------------------------|---------------------------------|-------------------------|--------------------------------------------------------------------------------------|
| 1    | 50-50                               | Milk white in color/rigid       | More brittle            |    |
| 2    | 70-30                               | Milk white in color/rigid       | brittle                 |   |
| 3    | 80-20                               | Milk white in color/soft        | flexible                |  |
| 4    | 90-10                               | Milk white in color/soft        | More flexible           |  |

**2. ST1 Comparison of separator thicknesses with commercial thickness.**

| S.No. | Type of separator                         | Thickness ( $\mu\text{m}$ ) |
|-------|-------------------------------------------|-----------------------------|
| 1     | Celgard Polypropylene 2400 (PP) Monolayer | 50                          |
| 2     | NKK cellulose(TF40)                       | 35                          |
| 3     | PVdF-SiO <sub>2</sub>                     | 90-110                      |

**3. Mechanical stability of as prepared PVdF-SiO<sub>2</sub> membrane with electrolyte solution**

The mechanical stability of electrolyte membrane soaked in electrolyte solution was determined using Methact Generic Tensile-stress vs strain measurement system, (from National Test House version 10.2.0.0), and the stress value of 2.33 MPa with moderate elongation of 9.81% was observed.

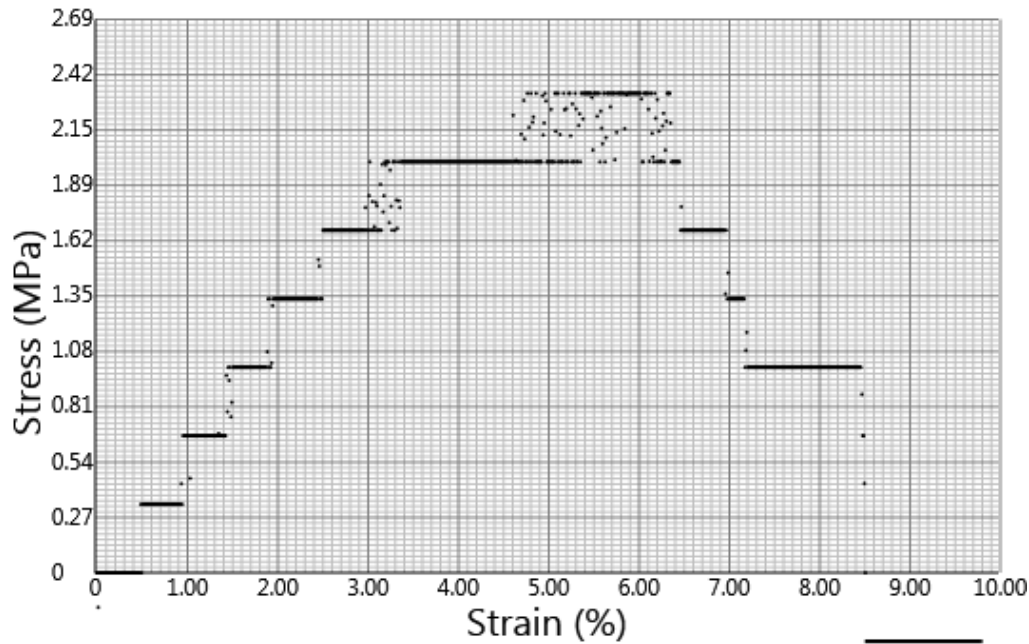

**4. Mechanical stability of membrane different ratios PVdF-SiO<sub>2</sub>.**

The mechanical stability of prepared membrane was obtained for samples of ratio (a) 90:10%, (b) 80:20% PVdF-SiO<sub>2</sub> contents respectively. The membrane of PVdF-SiO<sub>2</sub> 90:10% shows high mechanical stability by means of higher stress value around 4.67 MPa with total elongation around 9.41%. The sample of 80:20% PVdF-SiO<sub>2</sub> ratio shows low stress value 3.33 MPa with elongation of 7.42% when compared to 90:10% PVdF-SiO<sub>2</sub> membrane. From the observation when reach the certain amount of SiO<sub>2</sub> content in the PVdF polymer matrix reduce mechanical

stability of membrane due to the steric effect. The membrane with 70:30, 50:50% of PVdF-SiO<sub>2</sub> are brittle so the samples are not suitable for experiment.

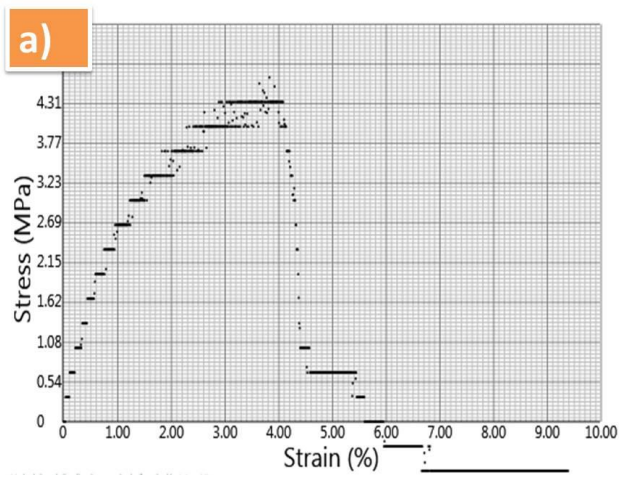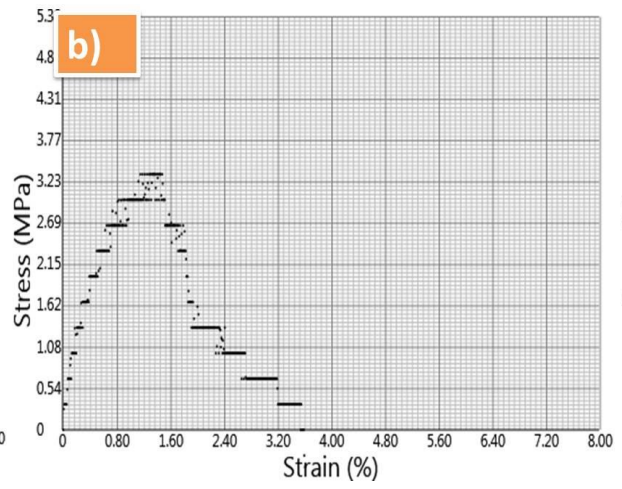

Supplement: s1 [file s1]
